# Supplementary material for: 3D-printing for forensic chemistry: voltammetric determination of cocaine on additively manufactured graphene–polylactic acid electrodes
Source: Royal Society of Chemistry journal article supplement (doi:10.1039/d1ay00181g), 2021-01-01
Supplement: d1ay00181g1.pdf [file d1ay00181g1.pdf]

*Supporting Information*

**3D-printing for forensic chemistry: Voltammetric determination of cocaine on additively manufactured graphene-polylactic acid electrodes**

Raquel G. Rocha,<sup>a+</sup> Julia S. Ribeiro,<sup>a+</sup> Mário H. P. Santana,<sup>b</sup> Eduardo M. Richter,<sup>a</sup>

Rodrigo A. A. Muñoz<sup>a\*</sup>

<sup>a</sup> Institute of Chemistry, Federal University of Uberlândia, 38408-100 Uberlândia, MG, Brazil

<sup>b</sup> Unidade Técnico-Científica, Superintendência Regional da Polícia Federal em MG, 38408-680, Uberlândia, Minas Gerais, Brazil

<sup>+</sup>RGR and JSR contributed equally in this work.

\*e-mail: munoz@ufu.br

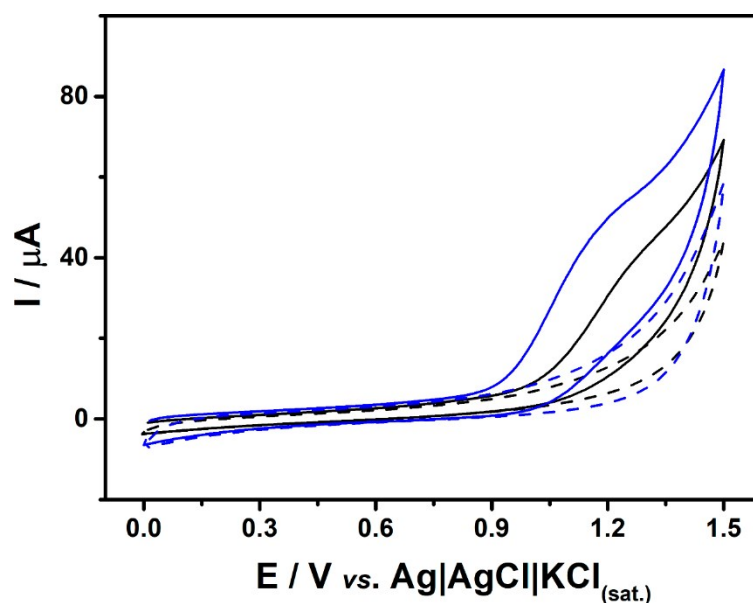

**Figure S1.** Cyclic voltammograms obtained for 1 mmol L<sup>-1</sup> cocaine in 0.1 mol L<sup>-1</sup> phosphate buffer (pH = 7.0), using electrochemically treated G-PLA electrode (blue line) and electrochemically C-PLA electrode (blue line) and respective blank signals (dashed lines). The G-PLA electrode was treated applying +1.76 V (*vs.* Ag|AgCl|KCl<sub>sat.</sub>) for 900 s and -1.76 V (*vs.* Ag|AgCl|KCl<sub>sat.</sub>) for 50 s in 0.1 mol L<sup>-1</sup> phosphate buffer (pH = 7.4). The C-PLA electrode was electrochemically treated applying +1.4 V (*vs.* Ag|AgCl|KCl<sub>sat.</sub>) for 200 s followed by -1.0 V (*vs.* Ag|AgCl|KCl<sub>sat.</sub>) for 200 s in 0.5 mol L<sup>-1</sup> NaOH. Scan rate: 50 mV s<sup>-1</sup>; Step potential: 5 mV.

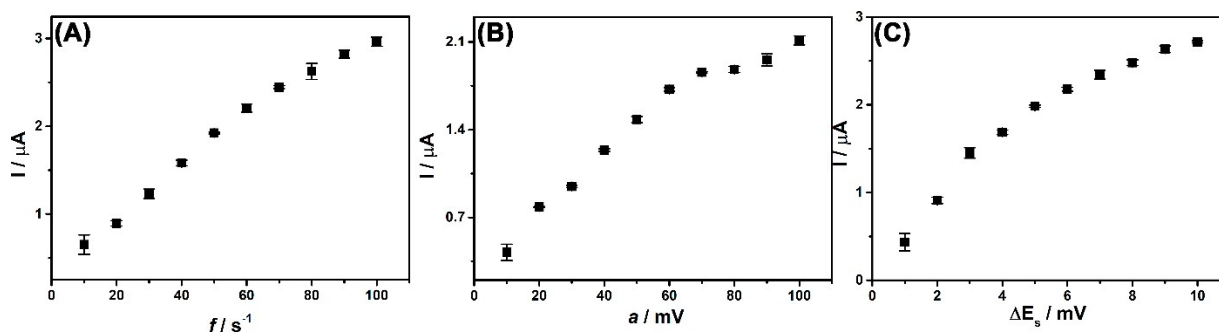

**Figure S2.** Relation between current peak ( $I$ ) of  $100 \mu\text{mol L}^{-1}$  cocaine ( $n=3$ ) and **(A)** frequency ( $f$ ), **(B)** amplitude ( $a$ ) and **(C)** step potential ( $\Delta E_s$ ). SWV parameters kept constant were:  $\Delta E_s = 5 \text{ mV}$  and  $f = 60 \text{ s}^{-1}$  and  $a = 60 \text{ mV}$ .

**Table S1.** Peak current, potential response of cocaine in the presence of interfering species, using the data of Figure 3.

| <b>Interfering species</b> | <b>Peak current / <math>\mu\text{A}</math></b> | <b>Peak potential / V</b> | <b>Recovery / %</b> |
|----------------------------|------------------------------------------------|---------------------------|---------------------|
| <b>COC</b>                 | 0.65                                           | 1.11                      | 100                 |
| <b>PAR</b>                 | 0.41                                           | 1.13                      | 64                  |
| <b>CAF</b>                 | 0.63                                           | 1.11                      | 97                  |
| <b>PRO</b>                 | 0.61                                           | 1.12                      | 94                  |
| <b>PHE</b>                 | 0.35                                           | 1.09                      | 54                  |
| <b>LID</b>                 | 0.31                                           | 1.09                      | 47                  |
| <b>BEN</b>                 | 0.42                                           | 1.09                      | 65                  |
| <b>LEV</b>                 | 0.22                                           | 1.11                      | 34                  |
